# Supplementary material for: Achieving outstanding temperature and frequency stability in NaNbO3-modified (Ba0.94Li0.02La0.04)(Mg0.04Ti0.96)O3 pulse energy storage ceramics
Source: Royal Society of Chemistry journal article supplement (doi:10.1039/d3ta01975f), 2023-01-01
Supplement: d3ta01975f2.pdf [file d3ta01975f2.pdf]

## Supplementary Information for

### **Achieving outstanding temperature and frequency stability in NaNbO<sub>3</sub> modified (Ba<sub>0.984</sub>Li<sub>0.02</sub>La<sub>0.04</sub>)(Mg<sub>0.04</sub>Ti<sub>0.96</sub>)O<sub>3</sub> pulse energy storage ceramics**

Guiwei Yan<sup>a</sup>, Jun Sun<sup>a</sup>, Juanwen Yan<sup>a</sup>, Bijun Fang<sup>a,\*</sup>, Shuai Zhang<sup>a</sup>, Xiaolong Lu<sup>a</sup>,  
Xiangyong Zhao<sup>b</sup>, Feifei Wang<sup>b</sup>, Jianning Ding<sup>a,c,\*</sup>

<sup>a</sup>School of Materials Science and Engineering, Jiangsu Collaborative Innovation Center of Photovoltaic Science and Engineering, Jiangsu Province Cultivation Base for State Key Laboratory of Photovoltaic Science and Technology, National Experimental Demonstration Center for Materials Science and Engineering, Changzhou University, Changzhou 213164, China

<sup>b</sup>Key Laboratory of Optoelectronic Material and Device, Department of Physics, Shanghai Normal University, Shanghai 200234, China

<sup>c</sup>School of Mechanical Engineering, Yangzhou University, Yangzhou 225127, China

\*Corresponding authors.

E-mail addresses: fangbj@cczu.edu.cn (B. Fang), dingjn@cczu.edu.cn (J. Ding)

Tel.: +86 519 86330095; Fax: +86 519 86330095

Eq. S1 The evolution route of electric tree:

$$p(i', j' \rightarrow i, j) = \frac{(\Phi_{i', j'} - \Phi_{i, j} - \Phi)^m}{\sum (\Phi_{i', j'} - \Phi_{i, j} - \Phi)^m} + (\Phi_{i', j'} - \Phi_{i'', j''} - \Phi)^m - loss$$

where  $\Phi_{i, j}$ ,  $\Phi_{i', j'}$ , and  $\Phi_{i'', j''}$  are the electric potential of the discharge, probable, and linked point, respectively.  $\Phi$  represents the threshold electrical potential of grain and grain boundary, *loss* denotes the loss of the tip electrical tree channels, and  $m$  is the fractal dimension.

Table S1 The fitting parameters of the fractal dielectric breakdown model and percolation model.

| parameter   | $x=0$                 |                | $x=0.15$            |                |
|-------------|-----------------------|----------------|---------------------|----------------|
| area        | 30×40 $\mu\text{m}^2$ |                | 6×8 $\mu\text{m}^2$ |                |
| Grid points | 150×200               |                | 150×200             |                |
|             | Grain                 | Grain boundary | Grain               | Grain boundary |
| $\varphi_0$ | 2.18                  | 6.33           | 0.36                | 1.28           |
| Loss        | 0.0108                | 0.0621         | 0.0037              | 0.0124         |
| $\eta$      | 1.0                   | 1.0            | 1.0                 | 1.0            |

Table S2 The  $BDS$ , average grain size,  $E_g$ ,  $R_b$ ,  $R_{gb}$  value of  $(1-x)BLLMT-xNN$  samples.

| $x$  | $BDS$ (kV/cm) | Average grain size ( $\mu\text{m}$ ) | $E_g$ (eV) | $R_b$ ( $\Omega$ ) at 410 °C | $R_{gb}$ ( $\Omega$ ) at 410 °C |
|------|---------------|--------------------------------------|------------|------------------------------|---------------------------------|
| 0.05 | 352.6         | 0.24                                 | 3.71       |                              | $3.89 \times 10^6$              |
| 0.1  | 324.9         | 0.2                                  | 3.69       |                              | $3.73 \times 10^6$              |
| 0.15 | 407.7         | 0.18                                 | 3.59       |                              | $8.93 \times 10^5$              |
| 0.2  | 362.2         | 0.22                                 | 3.64       |                              | $5.38 \times 10^6$              |
| 0.4  | 337.6         | 0.54                                 | 3.16       | $4.44 \times 10^5$           | $4.22 \times 10^6$              |
| 0.6  | 310.4         | 2.21                                 | 2.73       | $2.81 \times 10^5$           | $1.61 \times 10^6$              |

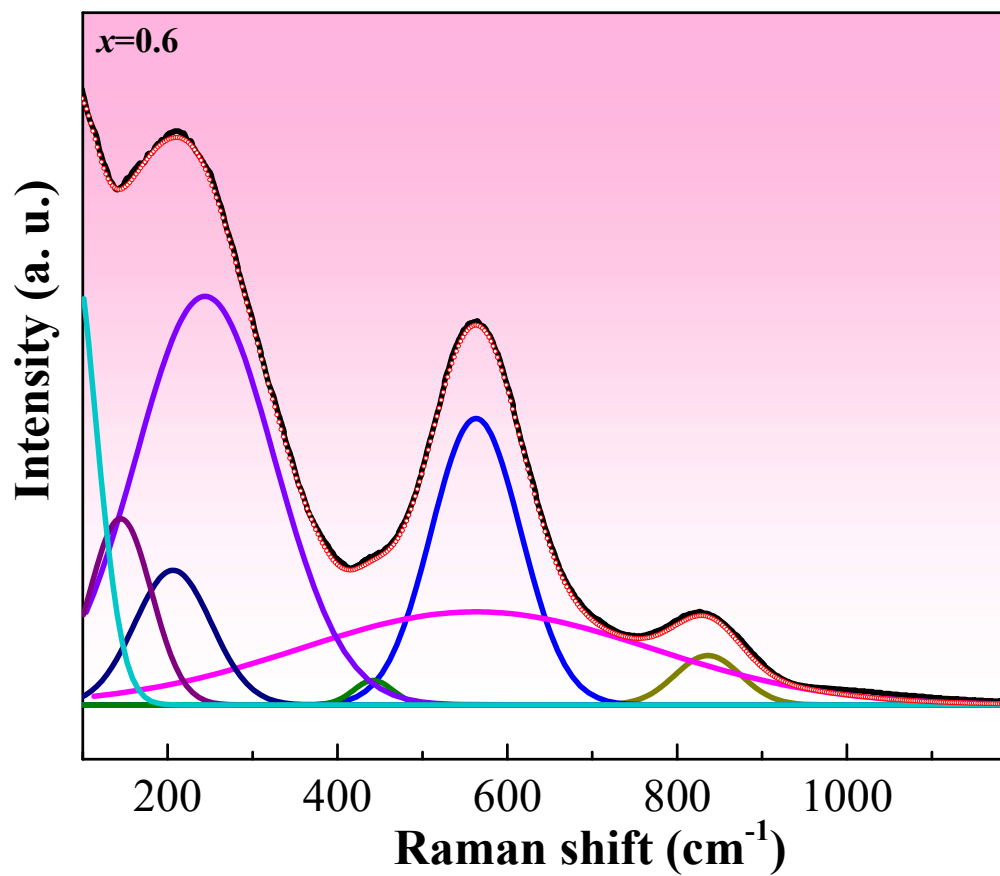

Fig. S1. Raman spectra and the spectral deconvolution into Gaussian-Lorentzian-shape peaks of the 0.4BLLMT-0.6NN ceramics.

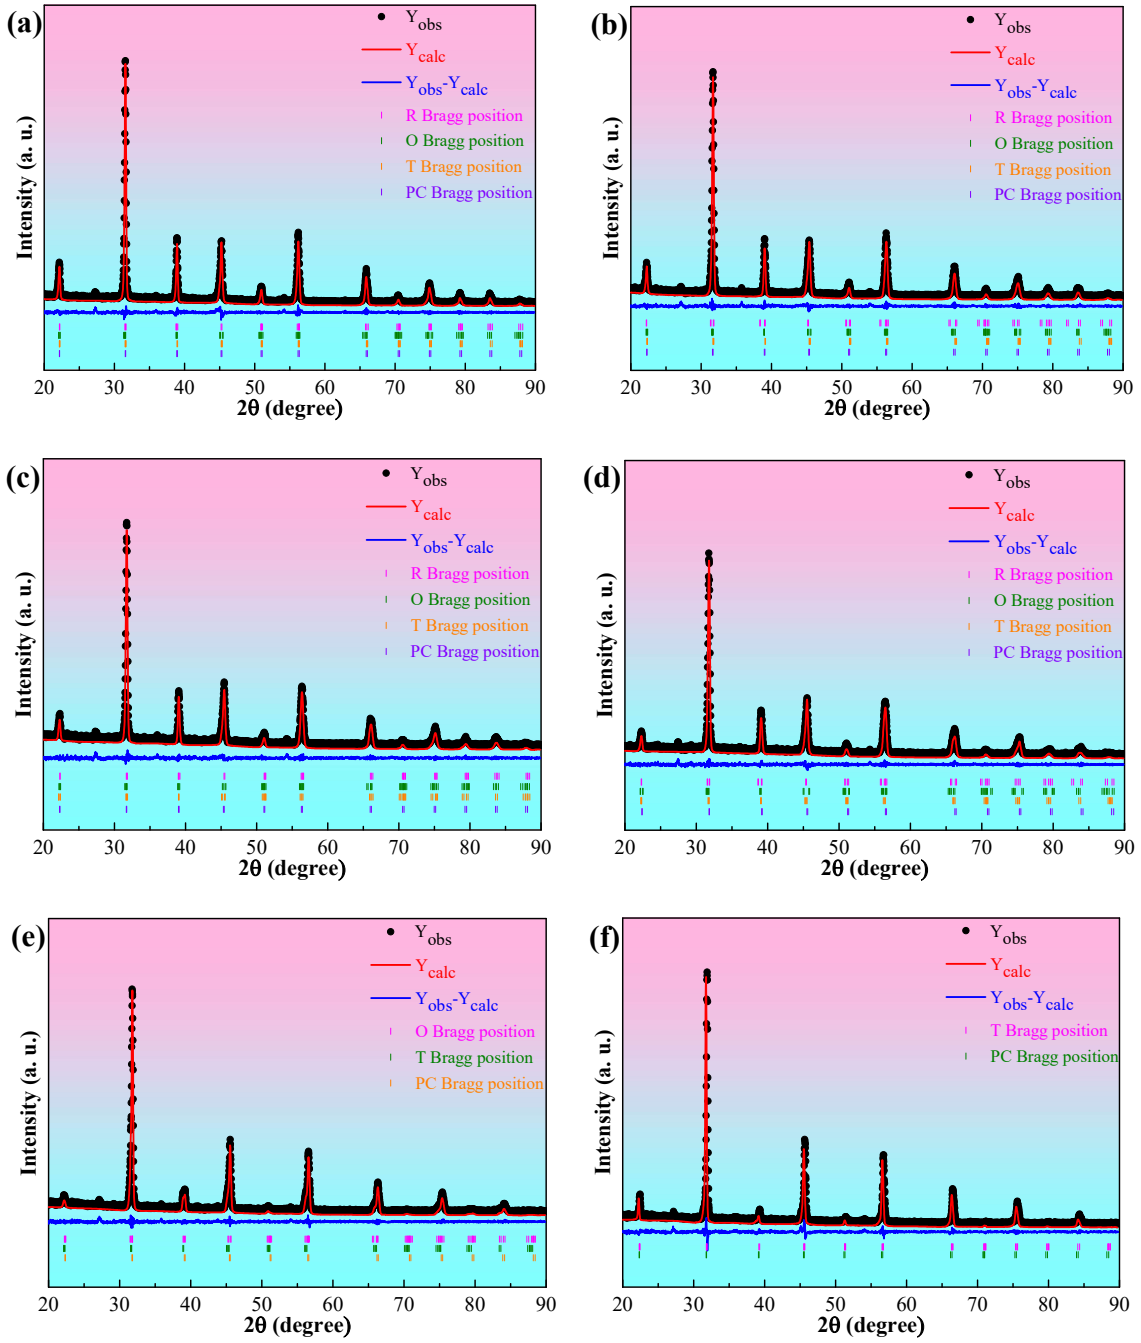

Fig. S2. Rietveld refinement results of the  $(1-x)\text{BLLMT}-x\text{NN}$  samples. (a)  $x=0.05$ ; (b)  $x=0.1$ ; (c)  $x=0.15$ ; (d)  $x=0.2$ ; (e)  $x=0.4$ ; (f)  $x=0.6$ .

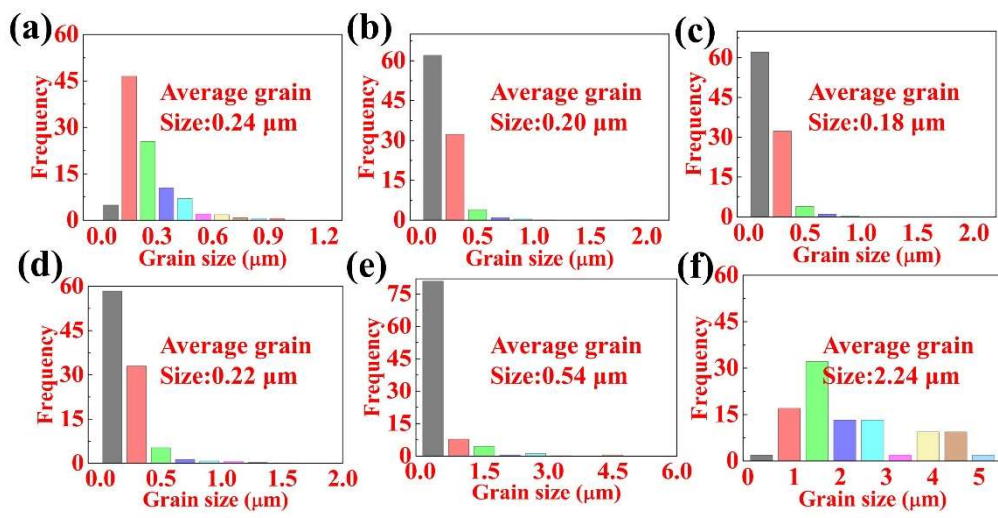

Fig. S3. The distribution of grain size and average grain size of the  $(1-x)\text{BLLMT-}x\text{NN}$  samples. (a)  $x=0.05$ ; (b)  $x=0.1$ ; (c)  $x=0.15$ ; (d)  $x=0.2$ ; (e)  $x=0.4$ ; (f)  $x=0.6$ .

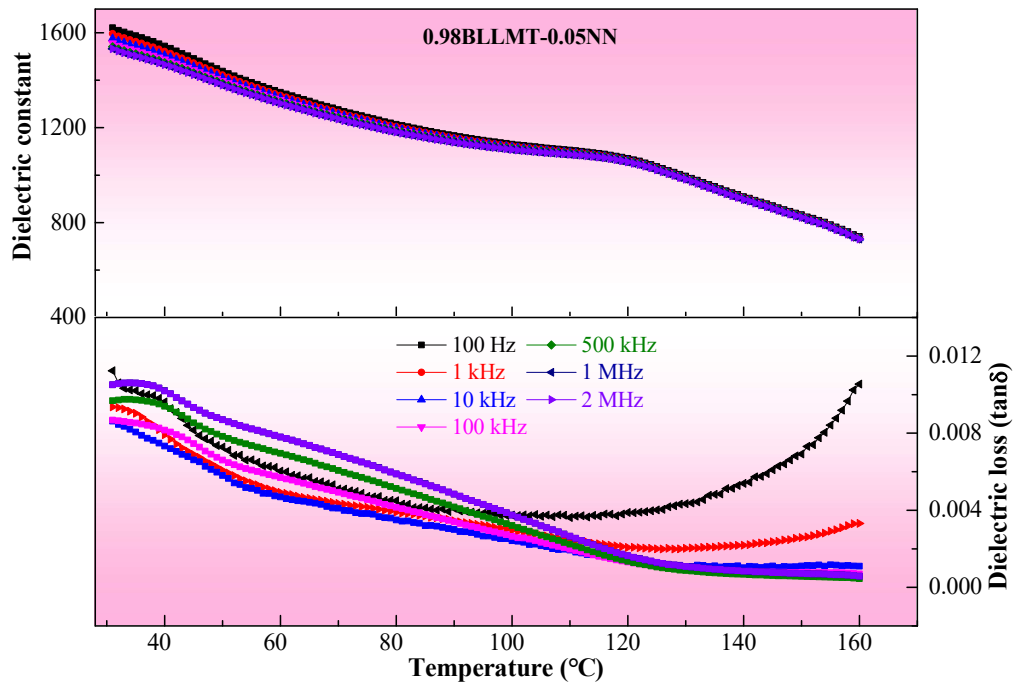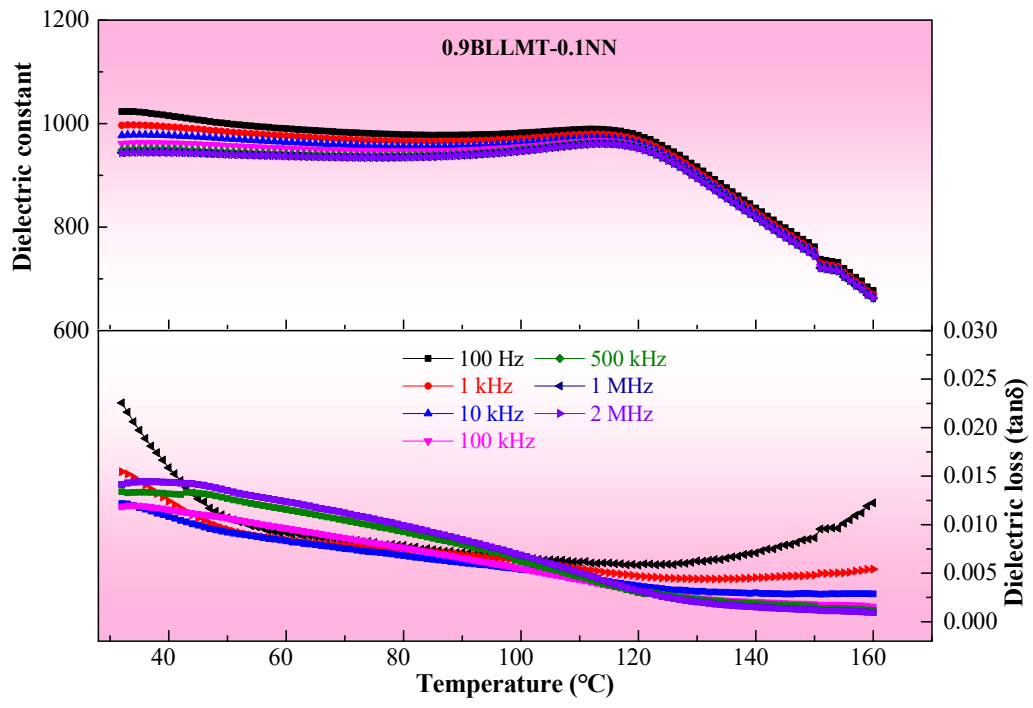



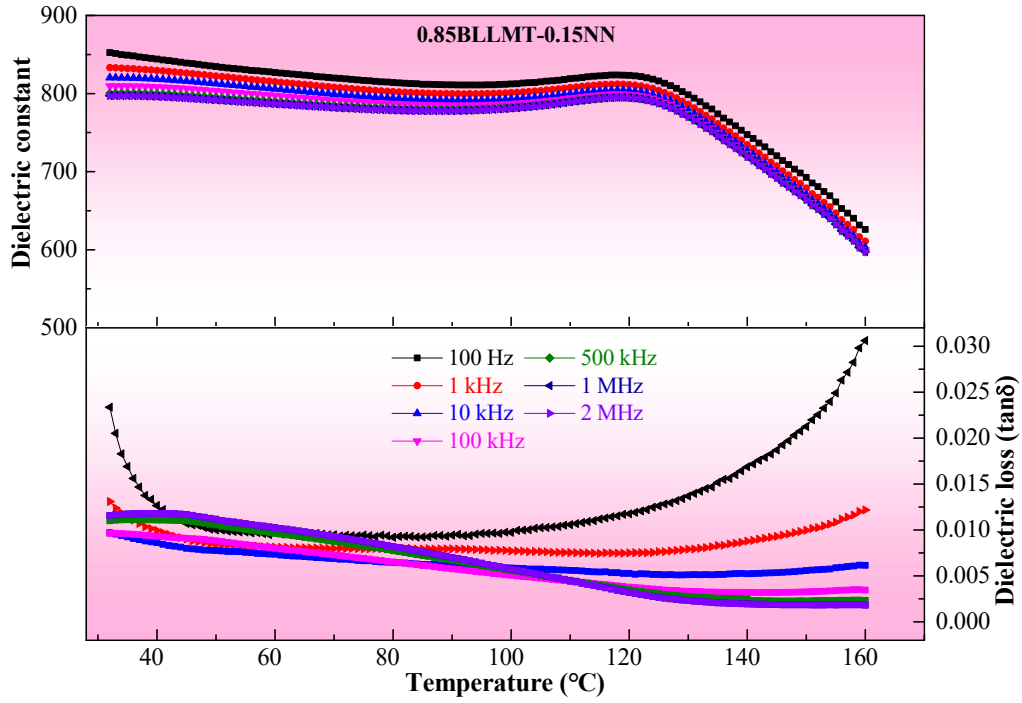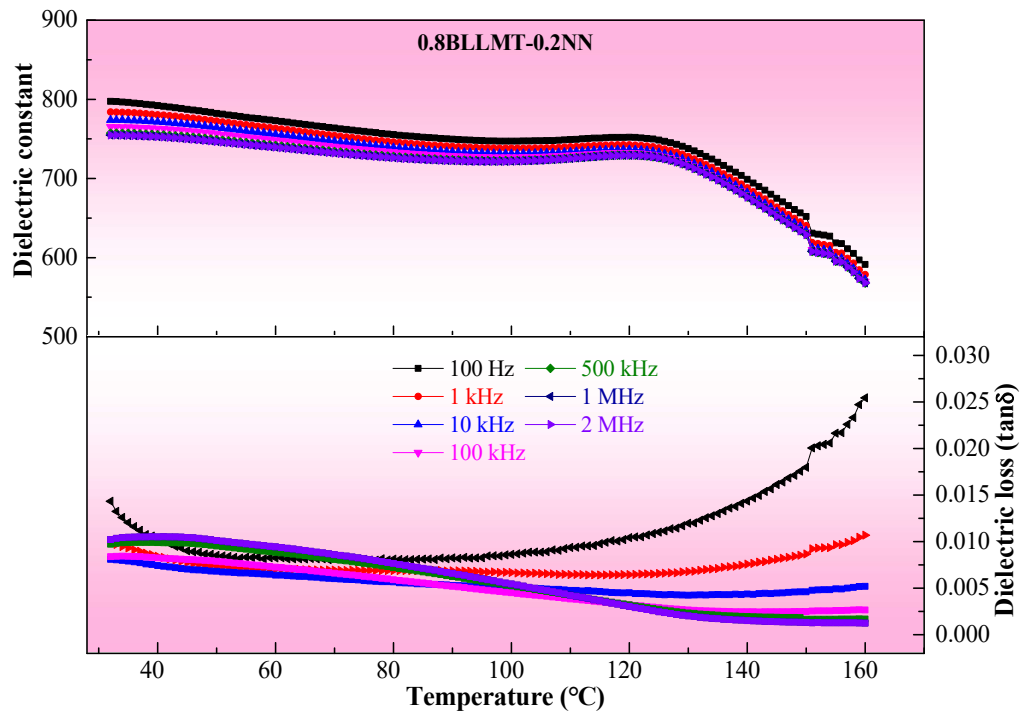

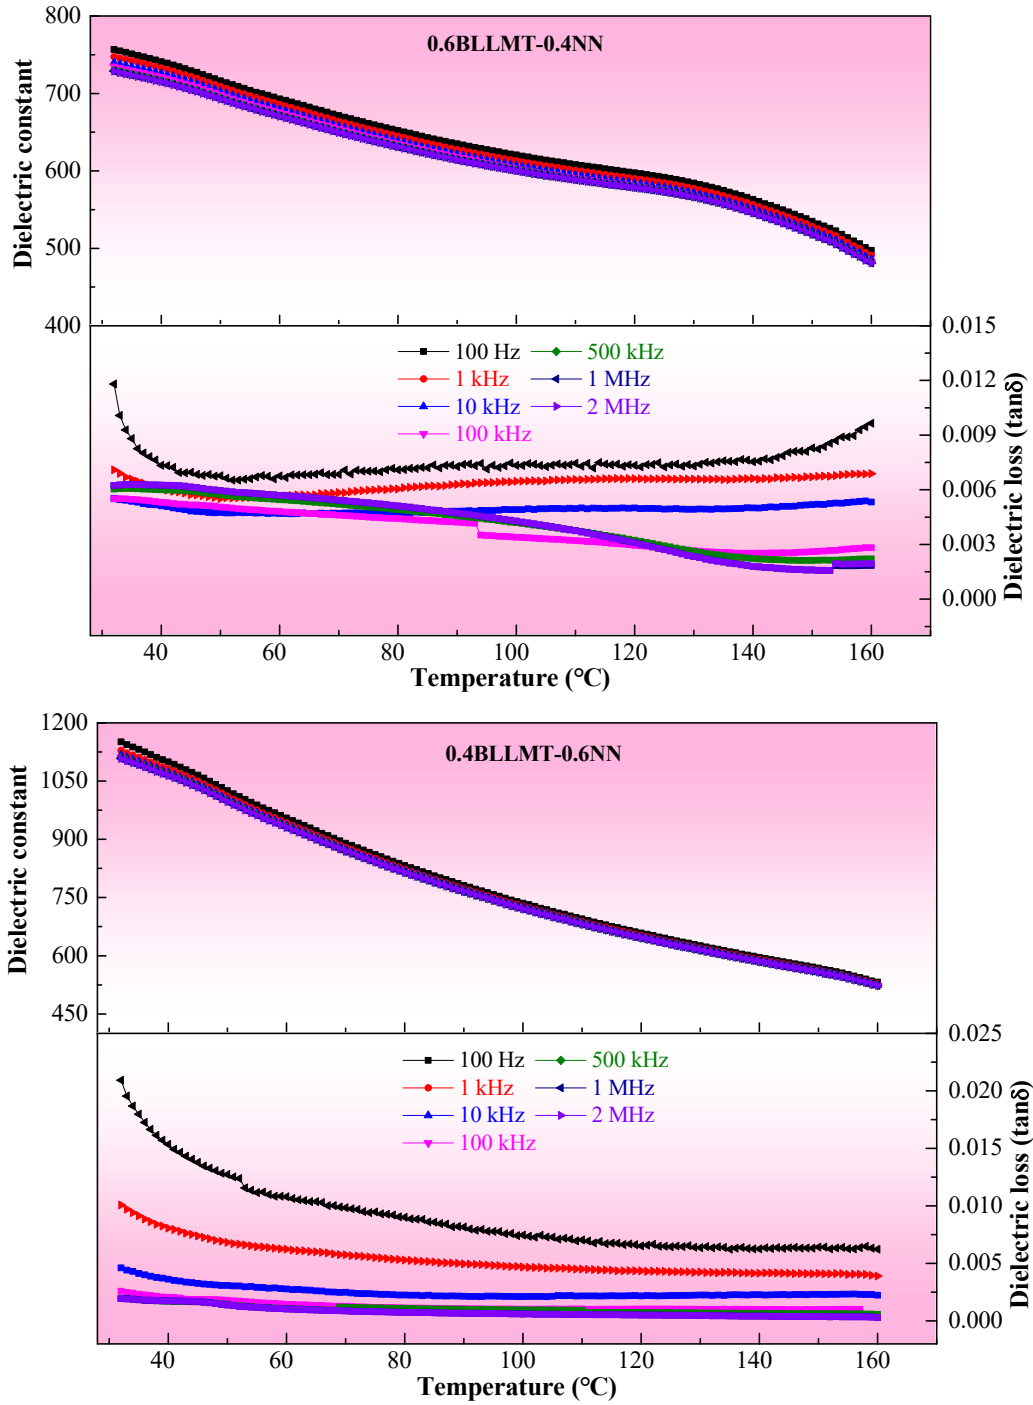

Fig. S4. Temperature dependence dielectric constant and dielectric loss of (1- $x$ )BLLMT- $x$ NN samples.

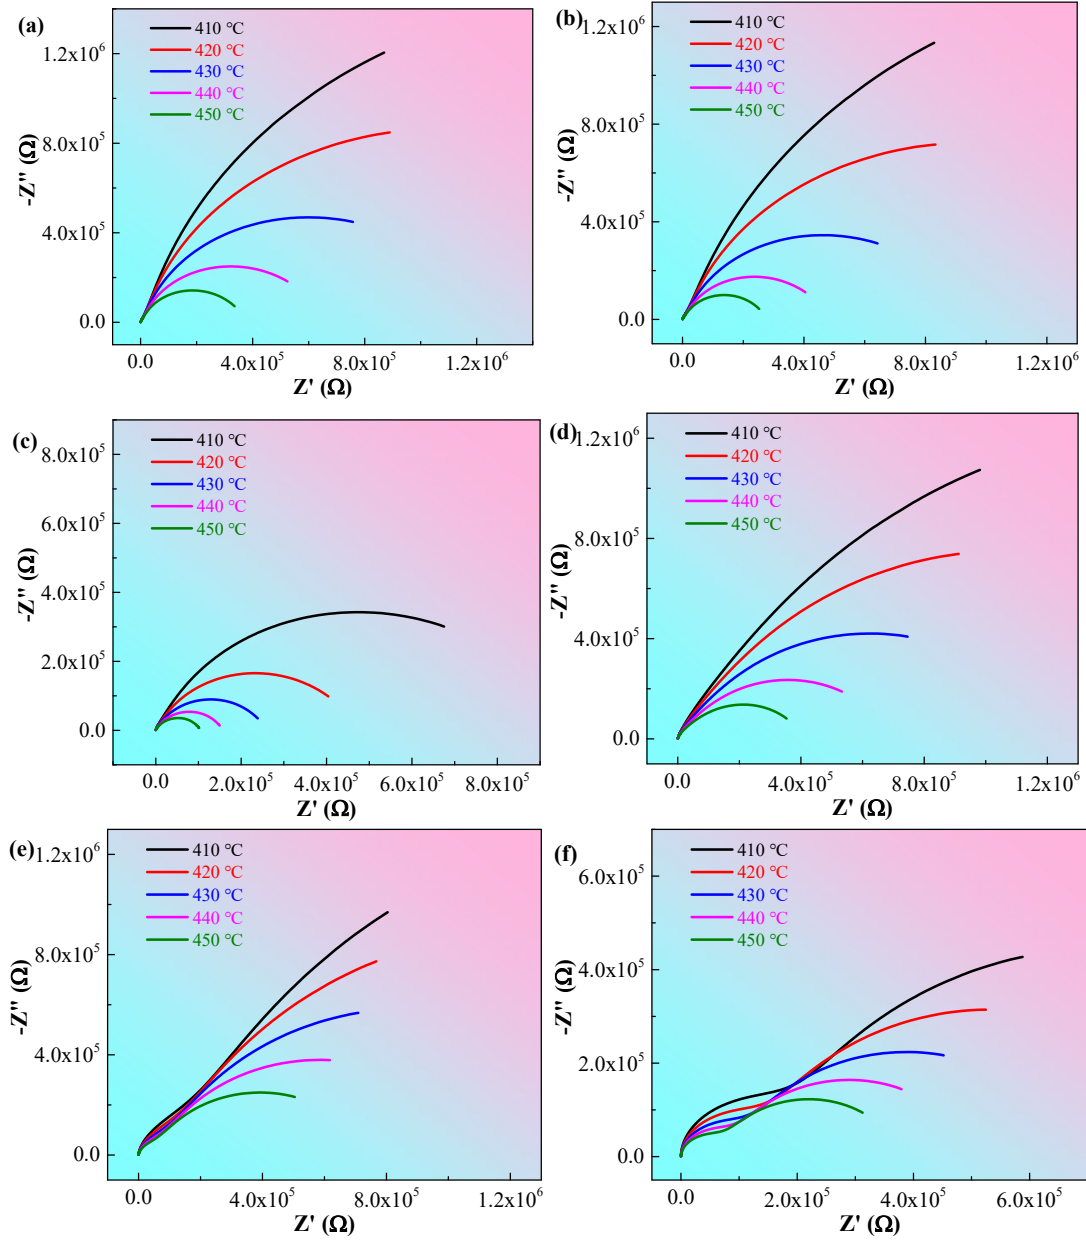

Fig. S5. The complex impedance spectra of the  $(1-x)\text{BLLMT}-x\text{NN}$  samples measured

at 410-450 °C. (a)  $x=0.05$ ; (b)  $x=0.1$ ; (c)  $x=0.15$ ; (d)  $x=0.2$ ; (e)  $x=0.4$ ; (f)  $x=0.6$ .

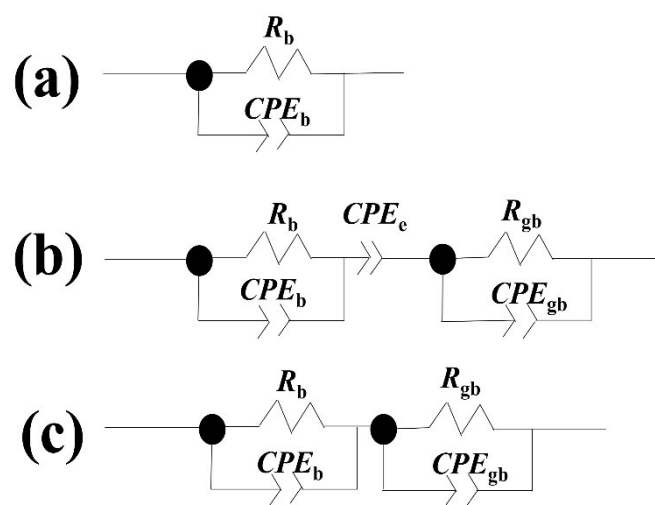

Fig. S6. The equivalent circuits of different impedance spectra.

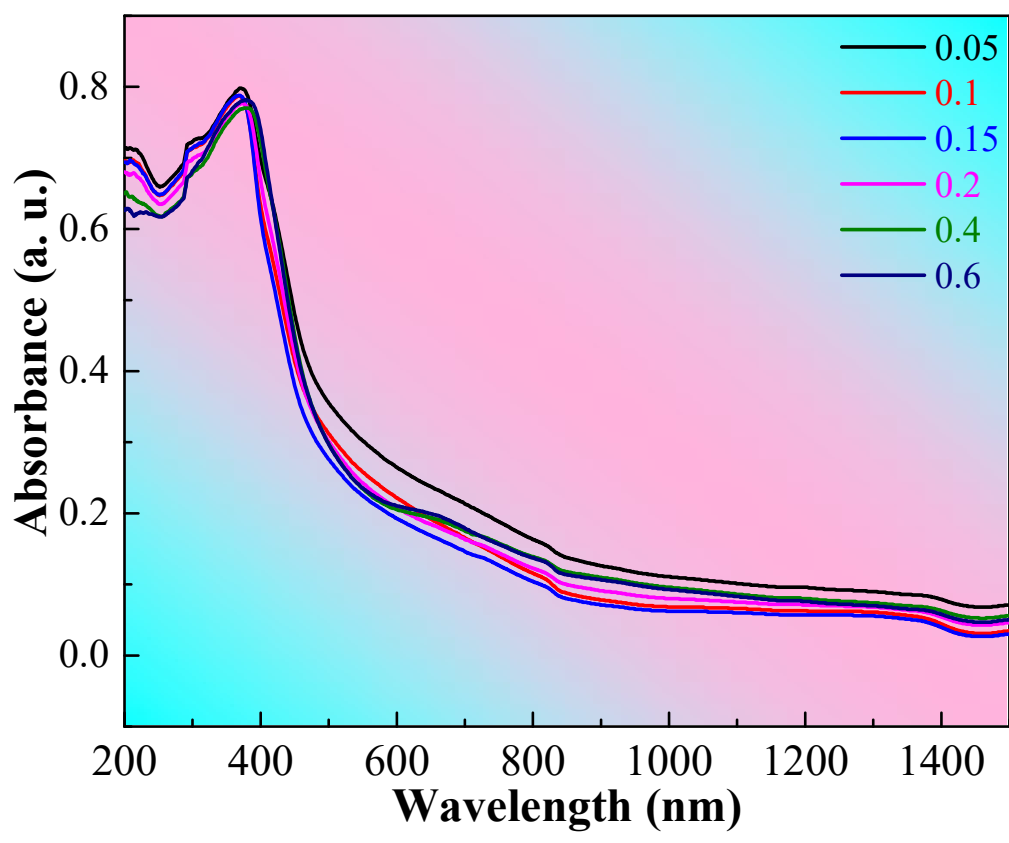

Fig. S7. The ultraviolet visible absorbable spectrum of the (1-x)BLLMT-xNN samples.

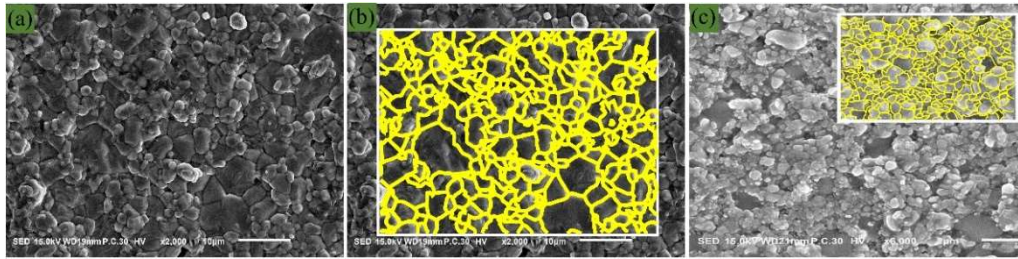

Fig. S8. (a) The SEM micrograph of pure BLLMT ceramics. The grain models used for finite element simulation achieved by machine learning using SEM micrograph of (b)  $x=0$  and (c)  $x=0.15$ .

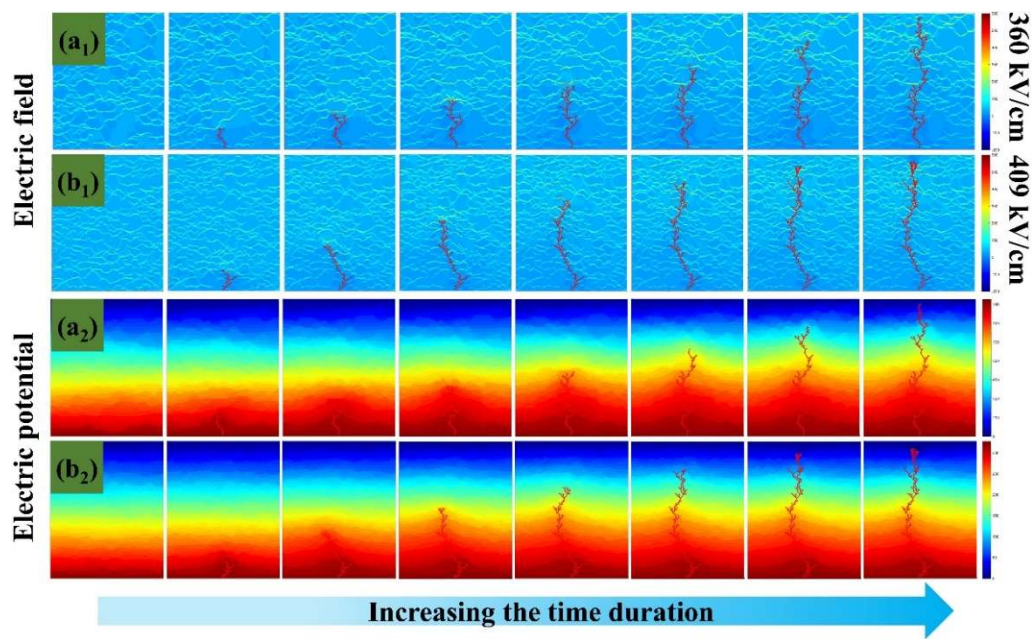

Fig. S9. The simulated electric field distribution and growth of electrical tree for (a<sub>1</sub>)  $x=0$  and (b<sub>1</sub>)  $x=0.15$ . The simulated electric potential distribution for (a<sub>2</sub>)  $x=0$  under 360 kV/cm and (b<sub>2</sub>)  $x=0.15$  under 409 kV/cm.

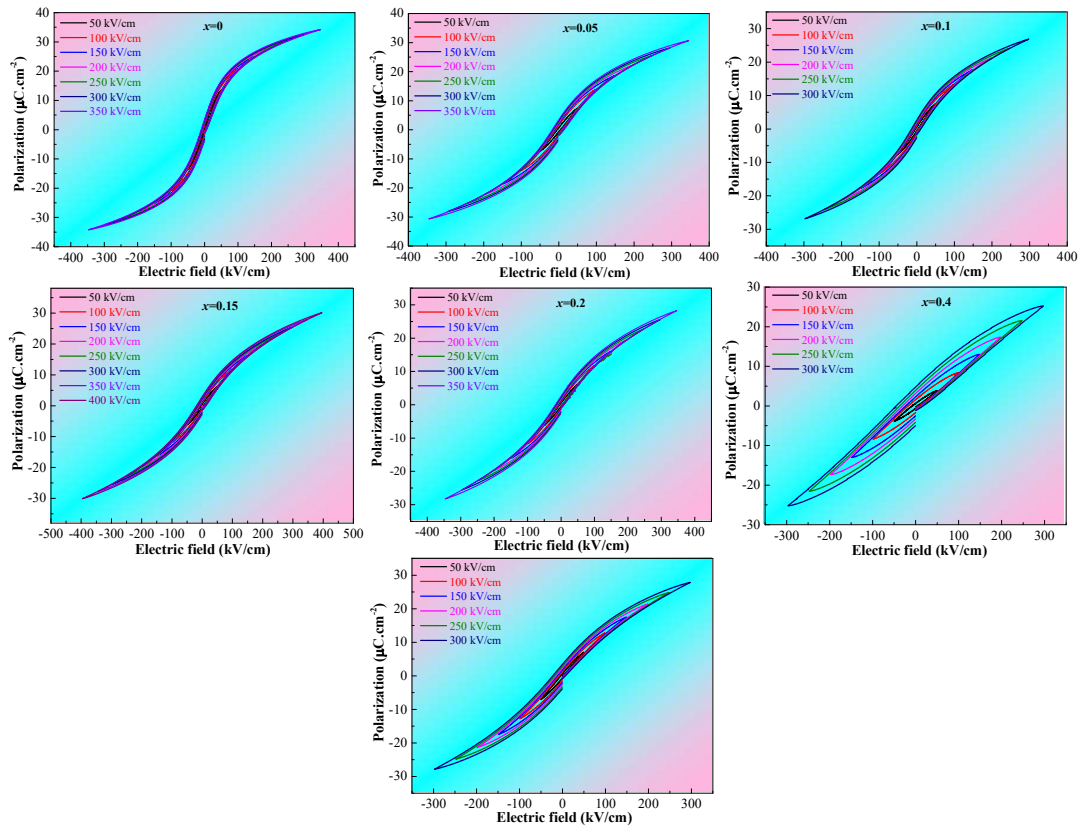

Fig. S10. The  $P$ - $E$  loops of the  $(1-x)\text{BLLMT}-x\text{NN}$  samples measured at un-breakdown state and 20 Hz.



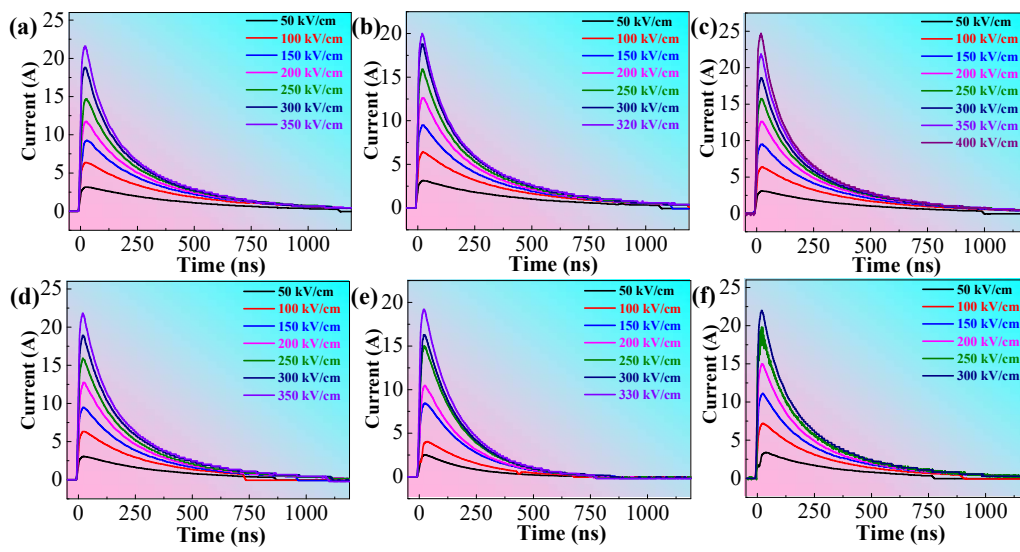

Fig. S11. Overdamped discharge current curves of the  $(1-x)\text{BLLMT}-x\text{NN}$  samples tested at different electric fields and  $150\ \Omega$ . (a)  $x=0.05$ ; (b)  $x=0.1$ ; (c)  $x=0.15$ ; (d)  $x=0.2$ ; (e)  $x=0.4$ ; (f)  $x=0.6$ .

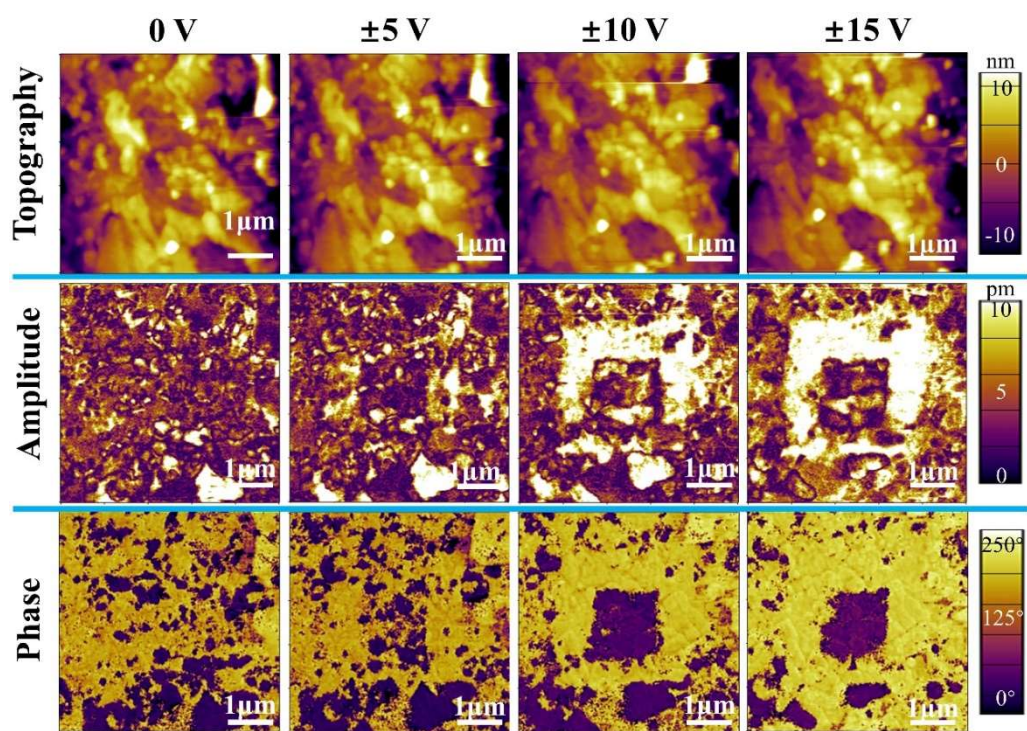

Fig. S12. Out-of-plane PFM images of the 0.85BLLMT-0.15NN sample measured at different electrical voltages.

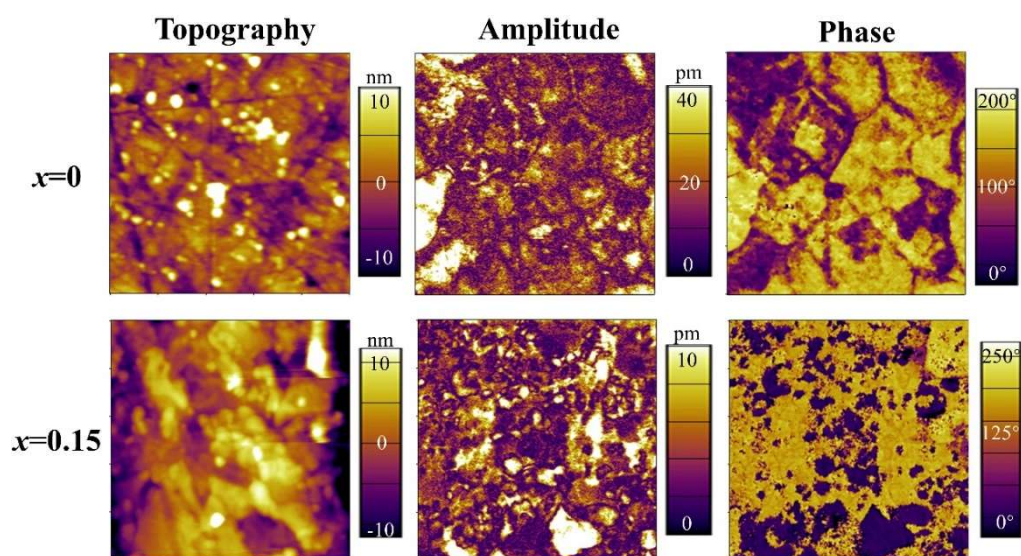

Fig. S13. Comparison of domain structure for pure BLLMT sample and 0.85BLLMT-0.15NN sample measured at  $\pm 5$  V.
