# Supplementary figures and images for: Achieving outstanding temperature and frequency stability in NaNbO3-modified (Ba0.94Li0.02La0.04)(Mg0.04Ti0.96)O3 pulse energy storage ceramics
Source: Royal Society of Chemistry journal article supplement (doi:10.1039/d3ta01975f), 2023-01-01

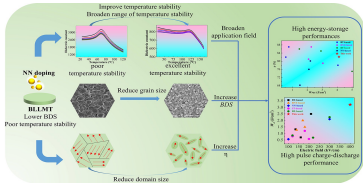

Supplement: d3ta01975f1.pdf [file d3ta01975f1.pdf]
